# Supplementary material
Source: publisher figshare collection journal article supplement (https://acs.figshare.com/ndownloader/files/4022380)
Supplement: Supplementary file 1 [file 4022380]

## **Supporting Information**

Layered Clay Aerogels by A Freeze-Drying Process for A Platinum-Supported Catalyst

*Tomohiko Okada,\* Taku Kato, Takeharu Yamaguchi, Toshio Sakai and Shoji Mishima*

Department of Chemistry and Material Engineering, Faculty of Engineering, Shinshu University,  
Wakasato 4-17-1, Nagano 380-8553, Japan

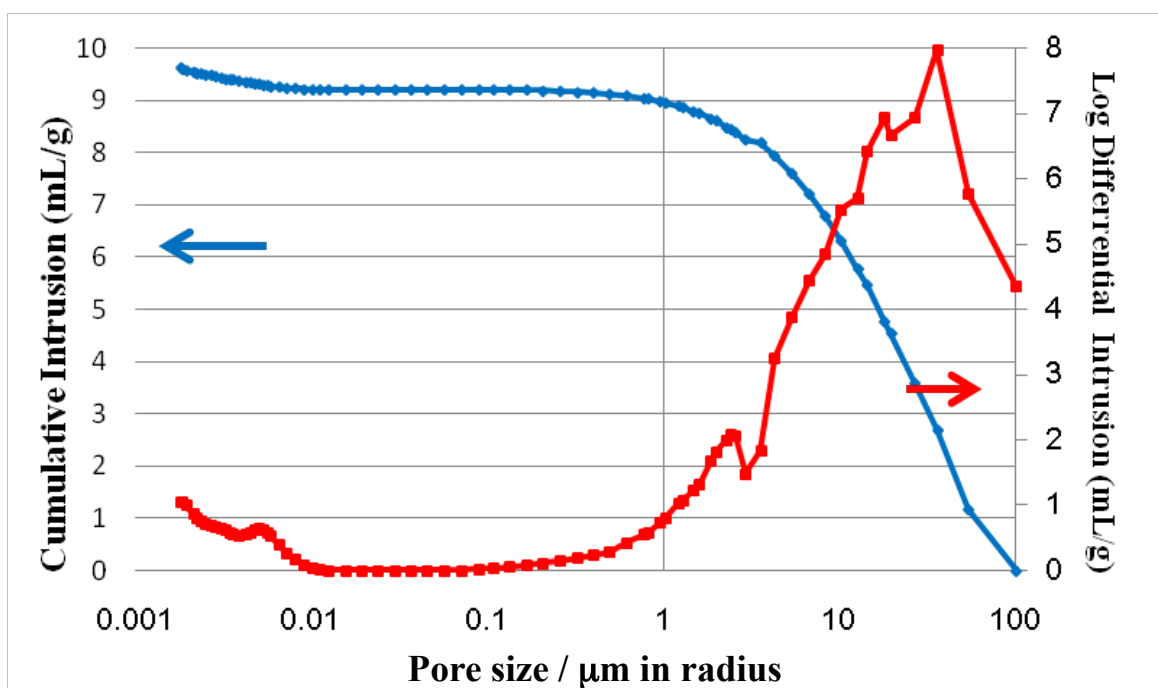

**Figure S1.** Pore size distribution from a mercury intrusion method regarding the aerogel obtained by freeze-drying thixotropic aqueous saponite gel (2 mass %) in liquid nitrogen.

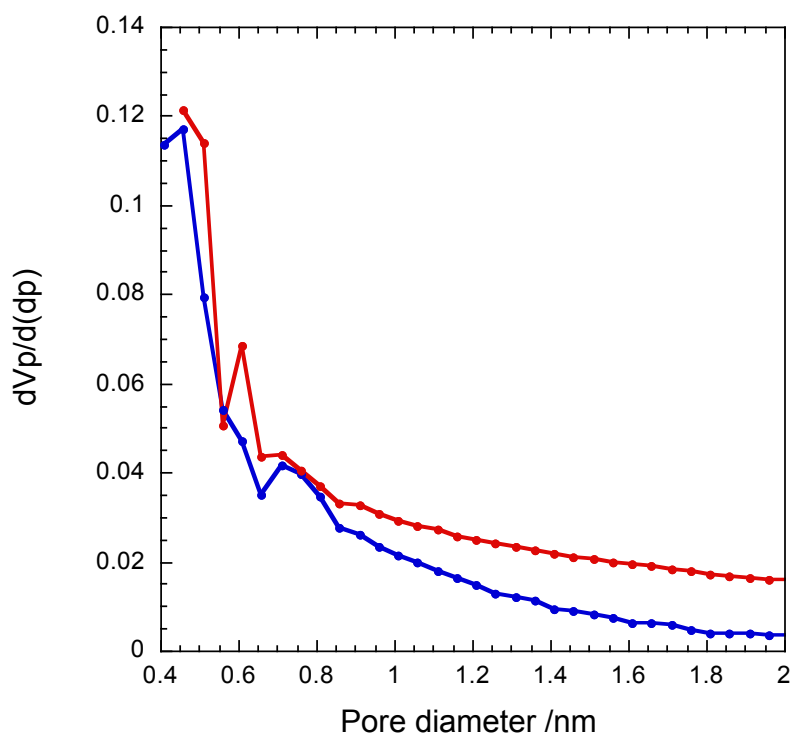

**Figure S2.** Pore size distributions by HK method from the N<sub>2</sub> adsorption isotherms shown in Figure 3 in the main text, regarding (blue) the aerogel obtained by freeze-drying thixotropic aqueous saponite gel (2 mass%), and (red) the saponite powder.

Excluded volume of platelet particles was calculated based on Onsager theory as following equation.

$$\text{Excluded volume} = \frac{1}{4}\pi D^2(L^2 + \frac{1}{2}(\pi + 3)DL + \frac{1}{4}\pi D^2) \quad (1)$$

From the diameter ( $D = 20$  nm), and the thickness ( $L = 1$  nm) of a silicate layer, the excluded volume of a silicate layer was calculated to be  $6 \times 10^{-24}$  [m<sup>3</sup>]. Considering that the ideal surface area of saponite is 700 m<sup>2</sup>/g (ref. 45), the mass of a silicate layer is  $1 \times 10^{-18}$  [g]. For example in the present system, the number of silicate layers in aqueous suspension (2 mass%) including 3 g saponite and 150 mL ( $1.5 \times 10^{-4}$  [m<sup>3</sup>]) of water results in  $3 \times 10^{18}$ . The excluded volume of saponite dispersed in water (2 mass%) is  $(6 \times 10^{-24}$  [m<sup>3</sup>])  $\times$  ( $3 \times 10^{18}$ ) =  $2 \times 10^{-5}$  [m<sup>3</sup>].

As to the suspensions of 0.5 and 3 mass%, the extended volumes are calculated to be  $5 \times 10^{-6}$  and  $3 \times 10^{-5}$  [m<sup>3</sup>], respectively.
